# Supplementary material for: Trimethoprim-Sulfamethoxazole Versus Levofloxacin for Stenotrophomonas maltophilia Infections: A Retrospective Comparative Effectiveness Study of Electronic Health Records from 154 US Hospitals
Source: PubMed Central journal article supplement — Open Forum Infect Dis. 2022 Jan 17;9(2):ofab644. doi: 10.1093/ofid/ofab644 (PMC8794591; doi:10.1093/ofid/ofab644), 2022-01-17
Supplement: ofab644_suppl_supplementary_appendix.pdf [file ofab644_suppl_supplementary_appendix.pdf]

**Trimethoprim-Sulfamethoxazole *versus* Levofloxacin for *Stenotrophomonas maltophilia*  
Infections: A Retrospective Comparative Effectiveness Study of Electronic Health Records  
from 154 U.S. Hospitals**

Sadia H. Sarzynski, Sarah Warner, Junfeng Sun, Roland Matsouaka, John P. Dekker, Ahmed Babiker, Willy Li, Yi Ling Lai, Robert L. Danner, Vance G. Fowler, Jr., Sameer S Kadri

## SUPPLEMENTARY APPENDIX

| <b>Table of Contents</b>                                                                                              | <b>Page</b> |
|-----------------------------------------------------------------------------------------------------------------------|-------------|
| Supplemental Methods                                                                                                  | <b>3</b>    |
| a. Sample size calculation                                                                                            |             |
| b. Definition of Polymicrobial infection                                                                              |             |
| Appendix Table 1: Antimicrobial agents with known activity against <i>S. maltophilia</i>                              | <b>3</b>    |
| Appendix Table 2: Imputation of Missing Susceptibility Data                                                           | <b>3</b>    |
| Appendix Table 3: Targeted therapy by infection site                                                                  | <b>4</b>    |
| Appendix Table 4: Conditions as defined by ICD Codes                                                                  | <b>4</b>    |
| Appendix Table 5: Imputation of Missing SOFA                                                                          | <b>4</b>    |
| Appendix Table 6: Polymicrobial Culture by Organism                                                                   | <b>5</b>    |
| Appendix Table 7: Polymicrobial Infection by Culture Site                                                             | <b>5</b>    |
| Appendix Table 8: Mechanical Ventilation Use in Overall Study Population                                              | <b>6</b>    |
| Appendix Table 9: Frequency of non-Present on Admission (POA) coding for<br><i>Clostridioides Difficile</i> Infection | <b>6</b>    |

## Supplemental Methods

### a. Sample Size Calculation

A prespecified sample size of n=500 patients per treatment was expected to allow for 80% power to detect a mortality rate difference 20% vs 28%, using 0.05-level 2-sided test. This was adjudicated by the authors as a clinically relevant difference in mortality.

### b. Polymicrobial Infections

Polymicrobial infections were defined as those encounters that had additional cultures sampled from the same site on the same date that grew an organism other than *S. maltophilia*. To rule out falsely identifying polymicrobial infections due to preliminary microbiology results, reports identifying gram-negative bacillus and gram-negative rods were not considered.

## Appendix Table 1: Antimicrobial Agents with Known Activity Against *Stenotrophomonas maltophilia*

A list of agents with known activity against *Stenotrophomonas maltophilia* in the literature was reviewed and applied as an exclusion criterion for case selection. This was done to enhance attribution of outcome to individual study drugs.

| Antimicrobial Class | Antimicrobial Agent                                         |
|---------------------|-------------------------------------------------------------|
| Macrolide           | Erythromycin                                                |
| Tetracycline        | Doxycycline, eravacycline, minocycline                      |
| Glycylcycline       | Tigecycline                                                 |
| Fluoroquinolones    | Moxifloxacin, ciprofloxacin                                 |
| Polymyxin           | Colistin                                                    |
|                     | Chloramphenicol                                             |
| Beta-Lactams        | Ticarcillin-clavulanate, ceftazidime, cefiderocol, cefepime |

Other potentially active agents: Ceftazidime-avibactam, polymyxin B and omadacycline were not found to be used in the cohort of interest.

## Appendix Table 2: Imputation of Missing Susceptibility Data

Approximately 10% of patients in the analysis cohort had no susceptibility data reported for the targeted therapy of interest in this study and were imputed to be susceptible to the therapy received. Patients who had susceptibility data for the culture and therapy of interest were only included if they were susceptible to the targeted therapy received.

| Targeted Therapy              | Susceptibility Available | Susceptibility Imputed |
|-------------------------------|--------------------------|------------------------|
| Levofloxacin                  | 734 (89.2%)              | 89 (10.8%)             |
| Trimethoprim-sulfamethoxazole | 683 (90.1%)              | 75 (9.9%)              |

**Appendix Table 3: Targeted Therapy by Infection Site**

| <b>Targeted Therapy</b>       | <b>Blood Culture</b> | <b>Respiratory Culture</b> |
|-------------------------------|----------------------|----------------------------|
| Levofloxacin                  | 99 (12.0%)           | 724 (88.0%)                |
| Trimethoprim-sulfamethoxazole | 64 (8.4%)            | 694 (91.6%)                |

**Appendix Table 4: Conditions Defined by International Classification of Diseases (ICD) Codes**

The study period spans through the transition of ICD-9-CM to ICD-10-CM.

|                        | <b>ICD Code(s)</b>                                                                                                     |
|------------------------|------------------------------------------------------------------------------------------------------------------------|
| Mechanical Ventilation | ICD9: 96.7, 96.71, 96.72<br>ICD10: 5A1935Z, 5A1945Z, 5A1955Z<br>CPT: 94002, 94003                                      |
| Cystic Fibrosis        | ICD9: 277.00, 277.01, 277.02, 277.03, 277.09<br>ICD10: E84                                                             |
| Pneumonia              | ICD9: 481, 485, 486, 514<br>ICD10: J18.0, J18.1, J18.2, J18.8, J18.9                                                   |
| Immunocompromised      | ICD9: 279x, 266.2, 273.0, 273.1, 273.2, 277.2, 277.6, 288.1, 289.89<br>ICD10: D71x, D80x, D81x, D82x, D83x, D84x, D89x |

**Appendix Table 5: Imputation of Missing SOFA**

SOFA on day of culture collection was included. The SOFA score was imputed missing as 0, under the assumption that the lack of laboratory tests or indicators of organ support on a given day (required to calculate a SOFA score) indicated a low clinical suspicion for abnormal results. The overall number of SOFA scores imputed as 0 were 58 of 1581 encounters or 3.6%.

| <b>Targeted Therapy</b>       | <b>SOFA Available</b> | <b>SOFA Imputed as 0</b> |
|-------------------------------|-----------------------|--------------------------|
| Levofloxacin                  | 798 (97.0%)           | 25 (3.0%)                |
| Trimethoprim-sulfamethoxazole | 725 (95.6%)           | 33 (4.4%)                |

**Appendix Table 6: Polymicrobial Culture by Organism**

This table depicts polymicrobial culture by speciated organism if present with a frequency greater than 5 occurrences to allow the reader to view the most common organisms that were identified in polymicrobial cultures.

| Organism                                                         | Levofloxacin<br>N=343 |               | Trimethoprim-<br>sulfamethoxazole<br>N=315 |               |
|------------------------------------------------------------------|-----------------------|---------------|--------------------------------------------|---------------|
|                                                                  | Respiratory<br>N=306  | Blood<br>N=37 | Respiratory<br>N=287                       | Blood<br>N=28 |
| <b>Speciated and Frequency of Occurrence <math>\geq 5</math></b> | <b>N=224</b>          | <b>N=21</b>   | <b>N=193</b>                               | <b>N=9</b>    |
| <i>Acinetobacter baumannii</i>                                   | 8                     | 1             | 8                                          | 1             |
| <i>Citrobacter freundii</i>                                      | 6                     | 1             | 1                                          |               |
| Coliforms                                                        | 5                     |               | 7                                          |               |
| <i>Enterobacter cloacae</i>                                      | 20                    | 2             | 15                                         | 2             |
| <i>Escherichia coli</i>                                          | 9                     | 1             | 7                                          | 2             |
| <i>Haemophilus influenzae</i>                                    | 8                     |               | 3                                          |               |
| <i>Klebsiella oxytoca</i>                                        | 7                     |               | 8                                          | 2             |
| <i>Klebsiella pneumoniae</i>                                     | 19                    | 4             | 16                                         |               |
| <i>Pseudomonas aeruginosa</i>                                    | 52                    | 5             | 39                                         |               |
| <i>Serratia marcescens</i>                                       | 16                    | 1             | 17                                         |               |
| <i>Staphylococcus aureus</i>                                     | 51                    | 5             | 60                                         | 2             |
| <i>Staphylococcus</i> sp., Coag Positive                         | 4                     |               | 1                                          |               |
| <i>Streptococcus pneumoniae</i>                                  | 11                    |               | 5                                          |               |
| <i>Streptococcus</i> sp., viridans group                         | 5                     | 1             | 5                                          |               |

**Appendix Table 7: Polymicrobial Infection by Culture Site**

| Targeted Therapy              | Infection Site | Polymicrobial Culture | Polymicrobial Culture Receiving Medication |
|-------------------------------|----------------|-----------------------|--------------------------------------------|
| Levofloxacin                  | Blood          | 37 (37.4%)            | 21 (21.2%)                                 |
|                               | Respiratory    | 306 (42.3%)           | 144 (19.9%)                                |
| Trimethoprim-sulfamethoxazole | Blood          | 28 (43.8%)            | 20 (31.2%)                                 |
|                               | Respiratory    | 287 (41.4%)           | 158 (22.8%)                                |

**Appendix Table 8: Mechanical Ventilation Use in Overall Study Population**

|                                   | <b>Levofloxacin (n=823)<br/>N (%)</b> | <b>Trimethoprim<br/>sulfamethoxazole (n=758)<br/>N (%)</b> |
|-----------------------------------|---------------------------------------|------------------------------------------------------------|
| Any Mechanical Ventilation        | 257 (31.2%)                           | 293 (38.7%)                                                |
| Mechanical Ventilation in Window* | 87 (10.6%)                            | 78 (10.3%)                                                 |

\* Window restricts mechanical ventilation variable to +/- 3 days of culture drawn to determine severity of illness at time of infection.

**Appendix Table 9: Frequency of non-Present on Admission (POA) coding for *Clostridioides Difficile* Infection**

This diagnosis code is without temporality to targeted therapy treatment window and does not reflect the presence of symptoms, including diarrhea, or laboratory testing for *C. difficile*. Thus, it may or may not reflect clinical *C. difficile* infection diagnosed during the hospitalization.

| <b>Targeted Therapy</b>       | <b>N (%) Non-POA <i>C. difficile</i> diagnosis code</b> |
|-------------------------------|---------------------------------------------------------|
| Levofloxacin                  | 9 (1.1%)                                                |
| Trimethoprim-sulfamethoxazole | 12 (1.6%)                                               |
