# Supplementary material for: Trimethoprim-Sulfamethoxazole Versus Levofloxacin for Stenotrophomonas maltophilia Infections: A Retrospective Comparative Effectiveness Study of Electronic Health Records from 154 US Hospitals
Source: PubMed Central journal article supplement — Open Forum Infect Dis. 2022 Jan 17;9(2):ofab644. doi: 10.1093/ofid/ofab644 (PMC8794591; doi:10.1093/ofid/ofab644), 2022-01-17
Supplement: ofab644_suppl_supplementary_figure_s1.pdf [file ofab644_suppl_supplementary_figure_s1.pdf]

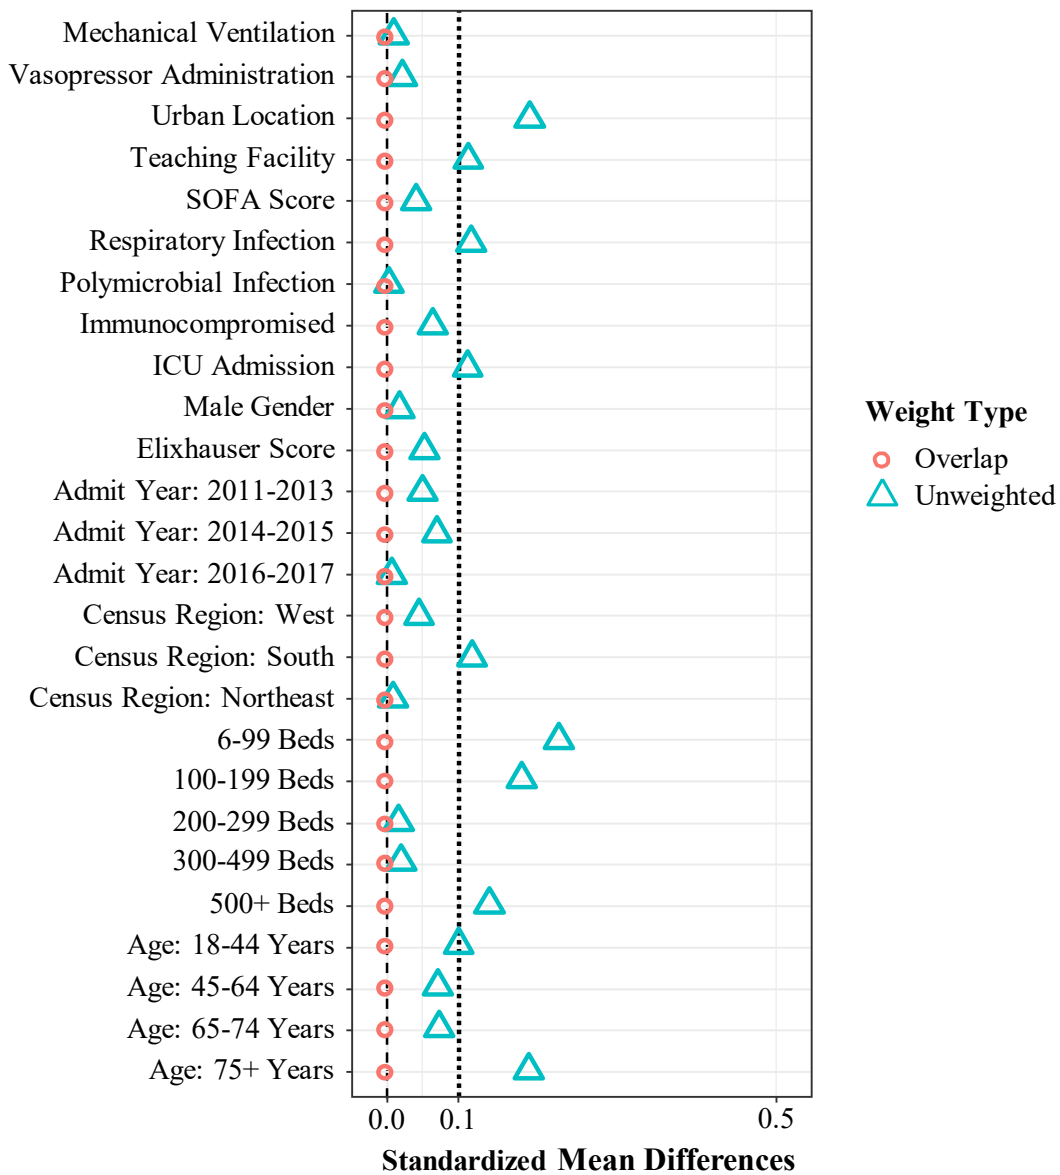

**Appendix Figure 1. Distribution of Overlap Weighting Variables.** Patient and hospital level factors were examined between treatment groups and overlap weighting methodology applied to balance groups on these covariates. Final balance reveals no standardized mean difference across covariates. A standardized mean difference of 0.1 is denoted here to allow the reader to visualize a goal standardized mean difference of less than 0.1 after overlap weighting.
