# Supplementary material for: Trimethoprim-Sulfamethoxazole Versus Levofloxacin for Stenotrophomonas maltophilia Infections: A Retrospective Comparative Effectiveness Study of Electronic Health Records from 154 US Hospitals
Source: PubMed Central journal article supplement — Open Forum Infect Dis. 2022 Jan 17;9(2):ofab644. doi: 10.1093/ofid/ofab644 (PMC8794591; doi:10.1093/ofid/ofab644), 2022-01-17
Supplement: ofab644_suppl_supplementary_figure_s2.pdf [file ofab644_suppl_supplementary_figure_s2.pdf]

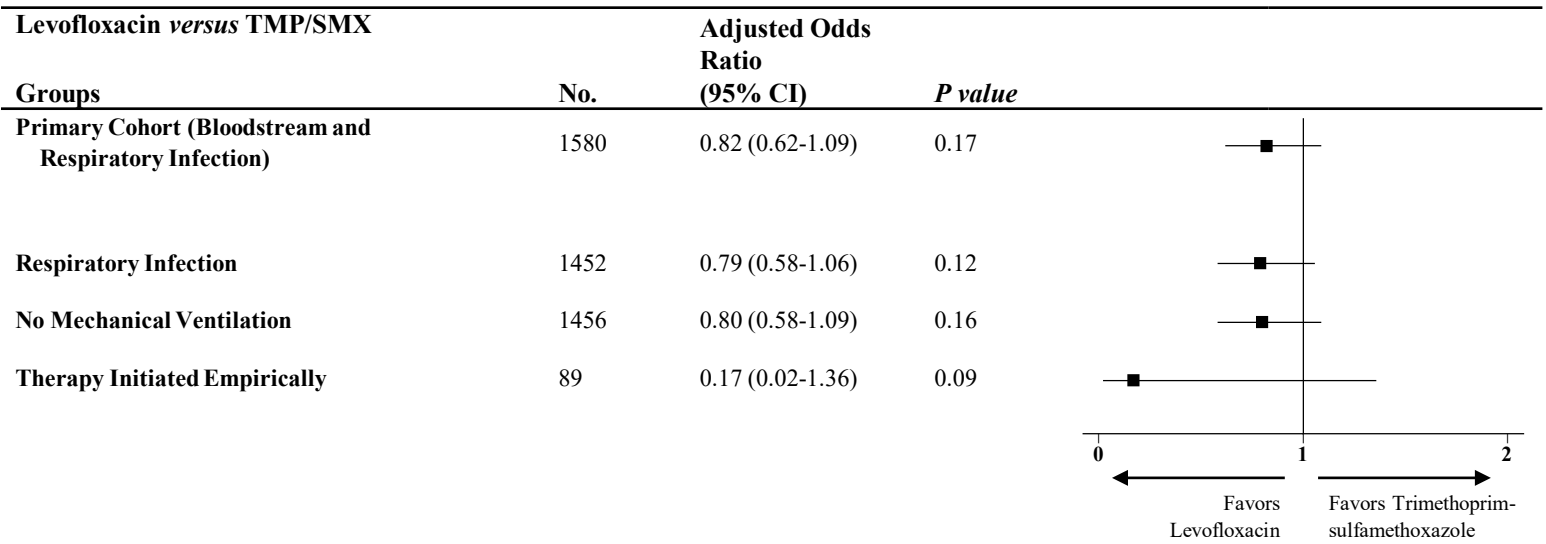

**Appendix Figure 2. Odds Ratios of Mortality for Levofloxacin versus Trimethoprim-sulfamethoxazole Targeted Therapy Among Primary Cohort and Sub-populations of Interest.** These results represent post-hoc analyses completed with adjustment for time-to-culture with sub-populations that yielded statistical significance in the primary analysis. Boxes depict hazard ratios with horizontal lines showing the respective 95% confidence intervals.

\*Excluding drugs with known activity against *S. maltophilia* other than Trimethoprim-sulfamethoxazole and Levofloxacin (Appendix Table 4)

† Unadjusted data calculated using Fisher's exact test

‡ Adjusted values were calculated using logistic regression after controlling for baseline patient and hospital level factors. Clinically relevant sub-populations were also analyzed for potential disparate impacts on mortality.
